# Supplementary material for: Protocol for a scoping review on the conceptualisation of learning in undergraduate clinical nursing practice
Source: PubMed Central journal article supplement — BMJ Open. 2019 Feb 3;9(2):e024360. doi: 10.1136/bmjopen-2018-024360 (PMC6377505; doi:10.1136/bmjopen-2018-024360), 2019-02-03
Supplement: bmjopen-2018-024360supp002.pdf [file bmjopen-2018-024360supp002.pdf]

**Additional file 2: Draft search strategy step 1**

**PubMed 9 May 2018**

| Search | Query                                                                                                                                                                                                                                                                                                                                                                                             | Items found |
|--------|---------------------------------------------------------------------------------------------------------------------------------------------------------------------------------------------------------------------------------------------------------------------------------------------------------------------------------------------------------------------------------------------------|-------------|
| #3     | ("Students, Nursing"[Mesh] OR "Internship, Nonmedical"[Mesh:noexp] OR (nursing[tiab] AND student*[tiab]) OR ((nursing[tiab] OR nurse[tiab] OR nurses[tiab]) AND internship*[tiab])) AND (((("Clinical Competence"[Mesh] OR "Clinical Medicine"[Majr] OR clinical*[ti] OR clinical*[ot] OR practice*[ti] OR practice[ot]) AND ("Learning"[Mesh] OR learning*[tiab])) OR clinical learning*[tiab])) | 3586        |

**Ebsco/ERIC 9 May 2018**

| #         | Query                                                                                                                                                                                                                                                                                                                                                                                                                                                                                                                                                                                                                                                                                                                                                                                                                                                                                                                                                                                                                                                                                                                                                                                                                                                                                                                                                                                                                                                                                                                                                                                                                                                                                                                                                                                                                                                                                                                                                          | Results        |
|-----------|----------------------------------------------------------------------------------------------------------------------------------------------------------------------------------------------------------------------------------------------------------------------------------------------------------------------------------------------------------------------------------------------------------------------------------------------------------------------------------------------------------------------------------------------------------------------------------------------------------------------------------------------------------------------------------------------------------------------------------------------------------------------------------------------------------------------------------------------------------------------------------------------------------------------------------------------------------------------------------------------------------------------------------------------------------------------------------------------------------------------------------------------------------------------------------------------------------------------------------------------------------------------------------------------------------------------------------------------------------------------------------------------------------------------------------------------------------------------------------------------------------------------------------------------------------------------------------------------------------------------------------------------------------------------------------------------------------------------------------------------------------------------------------------------------------------------------------------------------------------------------------------------------------------------------------------------------------------|----------------|
| <b>S7</b> | S1 AND S6                                                                                                                                                                                                                                                                                                                                                                                                                                                                                                                                                                                                                                                                                                                                                                                                                                                                                                                                                                                                                                                                                                                                                                                                                                                                                                                                                                                                                                                                                                                                                                                                                                                                                                                                                                                                                                                                                                                                                      | <b>408</b>     |
| <b>S6</b> | S4 OR S5                                                                                                                                                                                                                                                                                                                                                                                                                                                                                                                                                                                                                                                                                                                                                                                                                                                                                                                                                                                                                                                                                                                                                                                                                                                                                                                                                                                                                                                                                                                                                                                                                                                                                                                                                                                                                                                                                                                                                       | <b>70,505</b>  |
| <b>S5</b> | TI ("clinical learning*") OR AB ("clinical learning*")                                                                                                                                                                                                                                                                                                                                                                                                                                                                                                                                                                                                                                                                                                                                                                                                                                                                                                                                                                                                                                                                                                                                                                                                                                                                                                                                                                                                                                                                                                                                                                                                                                                                                                                                                                                                                                                                                                         | <b>84</b>      |
| <b>S4</b> | S2 AND S3                                                                                                                                                                                                                                                                                                                                                                                                                                                                                                                                                                                                                                                                                                                                                                                                                                                                                                                                                                                                                                                                                                                                                                                                                                                                                                                                                                                                                                                                                                                                                                                                                                                                                                                                                                                                                                                                                                                                                      | <b>70,505</b>  |
| <b>S3</b> | DE "Learning" OR DE "Active Learning" OR DE "Adult Learning" OR DE "Associative Learning" OR DE "Aural Learning" OR DE "Cooperative Learning" OR DE "Discovery Learning" OR DE "Discrimination Learning" OR DE "Electronic Learning" OR DE "Experiential Learning" OR DE "Incidental Learning" OR DE "Intentional Learning" OR DE "Interference (Learning)" OR DE "Lifelong Learning" OR DE "Mastery Learning" OR DE "Multisensory Learning" OR DE "Nonverbal Learning" OR DE "Observational Learning" OR DE "Prior Learning" OR DE "Problem Based Learning" OR DE "Rote Learning" OR DE "Second Language Learning" OR DE "Sequential Learning" OR DE "Serial Learning" OR DE "Student Centered Learning" OR DE "Symbolic Learning" OR DE "Transfer of Training" OR DE "Transformative Learning" OR DE "Verbal Learning" OR DE "Visual Learning" OR DE "Workplace Learning" OR DE "Active Learning" OR DE "Adult Learning" OR DE "Associative Learning" OR DE "Paired Associate Learning" OR DE "Aural Learning" OR DE "Cooperative Learning" OR DE "Discovery Learning" OR DE "Discrimination Learning" OR DE "Electronic Learning" OR DE "Experiential Learning" OR DE "Field Experience Programs" OR DE "Internship Programs" OR DE "Job Shadowing" OR DE "Service Learning" OR DE "Incidental Learning" OR DE "Intentional Learning" OR DE "Interference (Learning)" OR DE "Lifelong Learning" OR DE "Mastery Learning" OR DE "Multisensory Learning" OR DE "Nonverbal Learning" OR DE "Perceptual Motor Learning" OR DE "Observational Learning" OR DE "Prior Learning" OR DE "Problem Based Learning" OR DE "Rote Learning" OR DE "Second Language Learning" OR DE "Sequential Learning" OR DE "Serial Learning" OR DE "Student Centered Learning" OR DE "Symbolic Learning" OR DE "Transfer of Training" OR DE "Transformative Learning" OR DE "Verbal Learning" OR DE "Visual Learning" OR DE "Workplace Learning" OR TI (learning*) OR AB (learning*) | <b>381,995</b> |
| <b>S2</b> | DE "Clinical Experience" OR TI (clinical* OR practice*) OR AB (clinical* OR practice*)                                                                                                                                                                                                                                                                                                                                                                                                                                                                                                                                                                                                                                                                                                                                                                                                                                                                                                                                                                                                                                                                                                                                                                                                                                                                                                                                                                                                                                                                                                                                                                                                                                                                                                                                                                                                                                                                         | <b>205,148</b> |
| <b>S1</b> | DE "Nursing Students" OR TI ((nursing N3 student*) OR ((nursing OR nurse OR nurses) N3 internship*)) OR AB ((nursing N3 student*) OR ((nursing OR nurse OR nurses) N3 internship*))                                                                                                                                                                                                                                                                                                                                                                                                                                                                                                                                                                                                                                                                                                                                                                                                                                                                                                                                                                                                                                                                                                                                                                                                                                                                                                                                                                                                                                                                                                                                                                                                                                                                                                                                                                            | <b>2,294</b>   |

**Ebsco/CINAHL 9 May 2018**

| #          | Query                                                    | Results        |
|------------|----------------------------------------------------------|----------------|
| <b>S11</b> | S1 AND S10                                               | <b>3,209</b>   |
| <b>S10</b> | S5 OR S9                                                 | <b>14,430</b>  |
| <b>S9</b>  | S3 AND S8                                                | <b>12,924</b>  |
| <b>S8</b>  | MH "Clinical Competence+" OR TI (clinical* OR practice*) | <b>234,601</b> |
| <b>S7</b>  | S1 AND S6                                                | <b>5,669</b>   |
| <b>S6</b>  | S4 OR S5                                                 | <b>32,948</b>  |

|           |                                                                                                                                                                                                                                                                      |                |
|-----------|----------------------------------------------------------------------------------------------------------------------------------------------------------------------------------------------------------------------------------------------------------------------|----------------|
| <b>S5</b> | MH "Learning Environment, Clinical" OR TI ("clinical learning*") OR AB ("clinical learning*")                                                                                                                                                                        | <b>2,388</b>   |
| <b>S4</b> | S2 AND S3                                                                                                                                                                                                                                                            | <b>31,869</b>  |
| <b>S3</b> | MH "Learning+" OR MH "Conditioning (Psychology)+" OR MH "Memory+" OR MH "Reinforcement (Psychology)+" OR MH "Problem Solving+" OR TI (learning*) OR AB (learning*)                                                                                                   | <b>103,547</b> |
| <b>S2</b> | MH "Clinical Competence+" OR TI (clinical* OR practice*) OR AB (clinical* OR practice*)                                                                                                                                                                              | <b>631,184</b> |
| <b>S1</b> | MH "Students, Nursing+" OR MH "Students, Nursing, Baccalaureate+" OR MH "Students, Nursing, Graduate+" OR TI ((nursing N3 student*) OR ((nursing OR nurse OR nurses) N3 internship*)) OR AB ((nursing N3 student*) OR ((nursing OR nurse OR nurses) N3 internship*)) | <b>35,637</b>  |
